# Supplementary material
Source: HighWire-hosted journal article supplement (https://gut.bmj.com/content/69/10/1778)
Supplement: inline-supplementary-material-1 [file inline-supplementary-material-1.pdf]

Supplementary data 1:

### **Standardized imaging recording in RD setting**

#### Preparation

- Optimal cleansing by water jet
- Simethicone dilution in the cleansing water (if available)
- Maximal insufflation
- Centralization of the lumen
- Picture/recording before touching the mucosa
- Picture/recording before biopsy
- Picture/recording before passing with the scope

#### Location of mandatory pictures (completion of data file)

- rectum: Picture/recording taken just proximal from the anal canal
- sigmoid: Picture/recording taken at 20 cm from the anal margin
- normal tissue: Picture/recording taken proximal from the upper margin of the UC inflammation

#### Biopsy protocol

- In inflamed segments, biopsies were taken in the endoscopically most inflamed area of each evaluated segment of the colon (max 5 segments evaluated: rectum, sigmoid, descending colon, transverse colon, ascending colon).
