# Supplementary material
Source: HighWire-hosted journal article supplement (https://gut.bmj.com/content/69/10/1778)

Supplementary figure 1: ROC curve to determine the cut off of the red density score for histological remission based on the Roberts histological index. (RHI: Roberts histological index; ROC: Receiver operating characteristics).

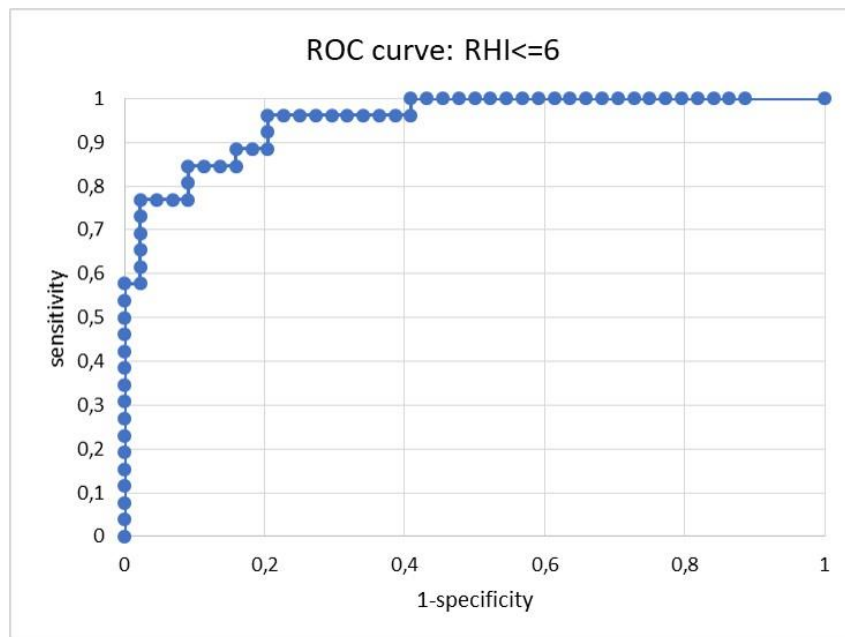

Supplement: inline-supplementary-material-2 [file inline-supplementary-material-2.pdf]
