# Supplementary material
Source: HighWire-hosted journal article supplement (https://gut.bmj.com/content/69/10/1778)

Supplementary figure 2: ROC curve to determine the cut off of the red density score for histological remission based on the Geboes score. (A) Geboes score <2.0: sensitivity of 88% and specificity of 86% resulting in a positive predictive value of 86% and negative predictive value of 89%. The area under the curve (AUC) was 0.94. (B) Geboes score <3.1: sensitivity of 90% and specificity of 83% resulting in a positive predictive value of 79% and negative predictive value of 92%. The area under the curve (AUC) was 0.93. (ROC: Receiver operating characteristics; GBS: Geboes score)

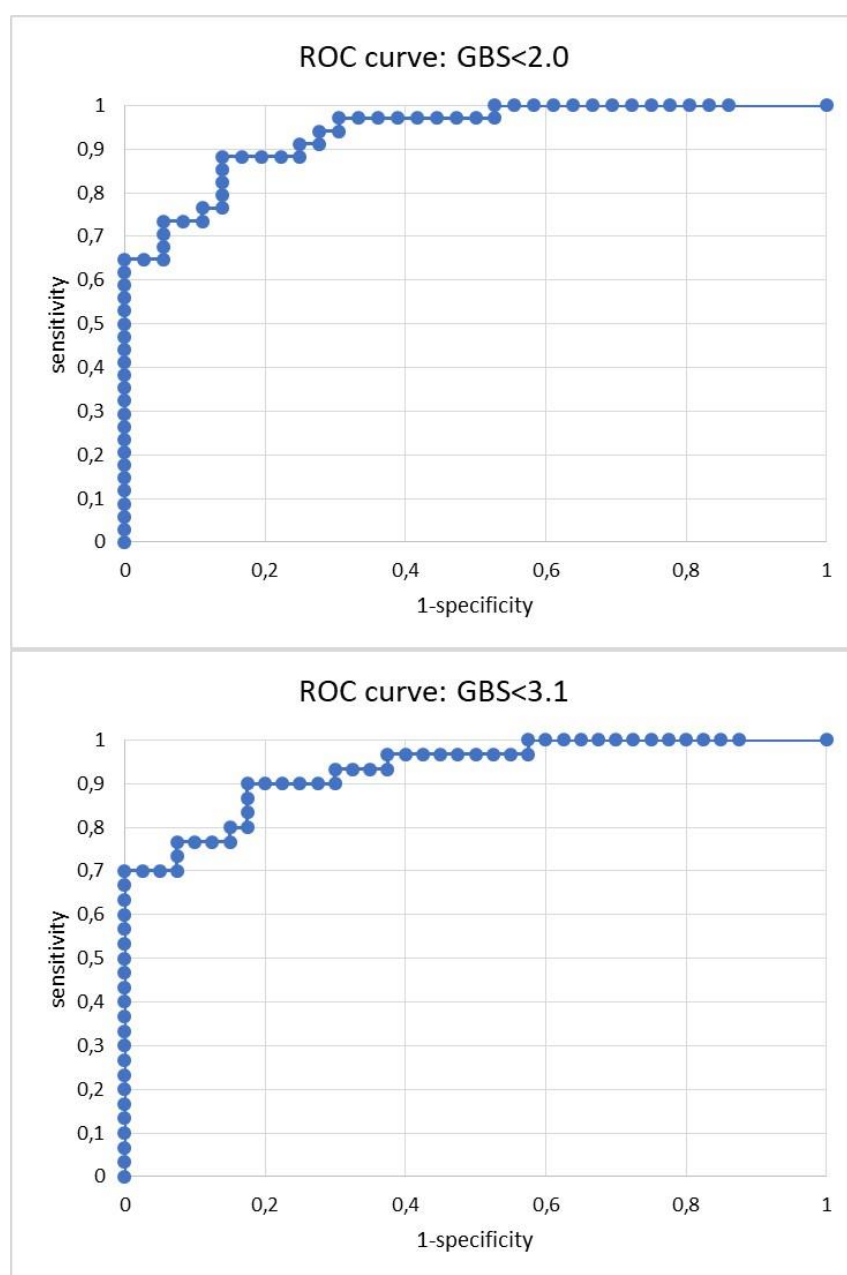

Supplement: inline-supplementary-material-3 [file inline-supplementary-material-3.pdf]
